# Supplementary material for: Gut Bacterial Microbiota and its Resistome Rapidly Recover to Basal State Levels after Short-term Amoxicillin-Clavulanic Acid Treatment in Healthy Adults
Source: PubMed Central journal article supplement (PMC6060159; doi:10.1038/s41598-018-29229-5), 2018-07-25
Supplement: 41598_2018_29229_MOESM1_ESM.pdf [file 41598_2018_29229_MOESM1_ESM.pdf]

# Gut Bacterial Microbiota and its Resistome Rapidly Recover to Basal State Levels after Short-term Amoxicillin-Clavulanic Acid Treatment in Healthy Adults

Chad W. MacPherson<sup>1\*</sup>, Olivier Mathieu<sup>1</sup>, Julien Tremblay<sup>2</sup>, Julie Champagne<sup>2</sup>, André Nantel<sup>3</sup>, Stéphanie-Anne Girard<sup>1</sup> and Thomas A. Tompkins<sup>1</sup>

## Supplementary Figures:

**Figure S1.** Alpha diversity metrics (Shannon index) boxplots computed from all OTUs for each experimental condition. Statistical significance was assessed with a t-test: For each group, comparisons between V3 and V2, V4 and V5 were significant (\*\*\*:  $p$ -value < 0.0001 or \*\*:  $p$ -value < 0.005). Group A - Placebo Supplement; Group B - Probiotic Supplement

**Figure S2.** Beta diversity (Weighted UniFrac) metrics computed from all OTUs. Each point represents a sample. Permanova was performed using the “adonis” function of the vegan library. Group A - Placebo Supplement; Group B - Probiotic Supplement

**Figure S3.** Beta diversity (Weighted UniFrac) metrics computed from all OTUs. Each point represents a sample. Permanova was performed using the “adonis” function of the vegan library. In each plot, all points having the same color represent a sample from the same individual for all experimental conditions.

**Figure S4.** Summary *in silico* analysis of selected enriched ABR genes (Fig.8) for antimicrobial + supplement (visit 3) in both groups from the classes of aminoglycosides and beta-lactams that were linked to various opportunistic pathogens of the family of *Enterobacteriaceae* using the Comprehensive Antibiotic Resistance Database (CARD).

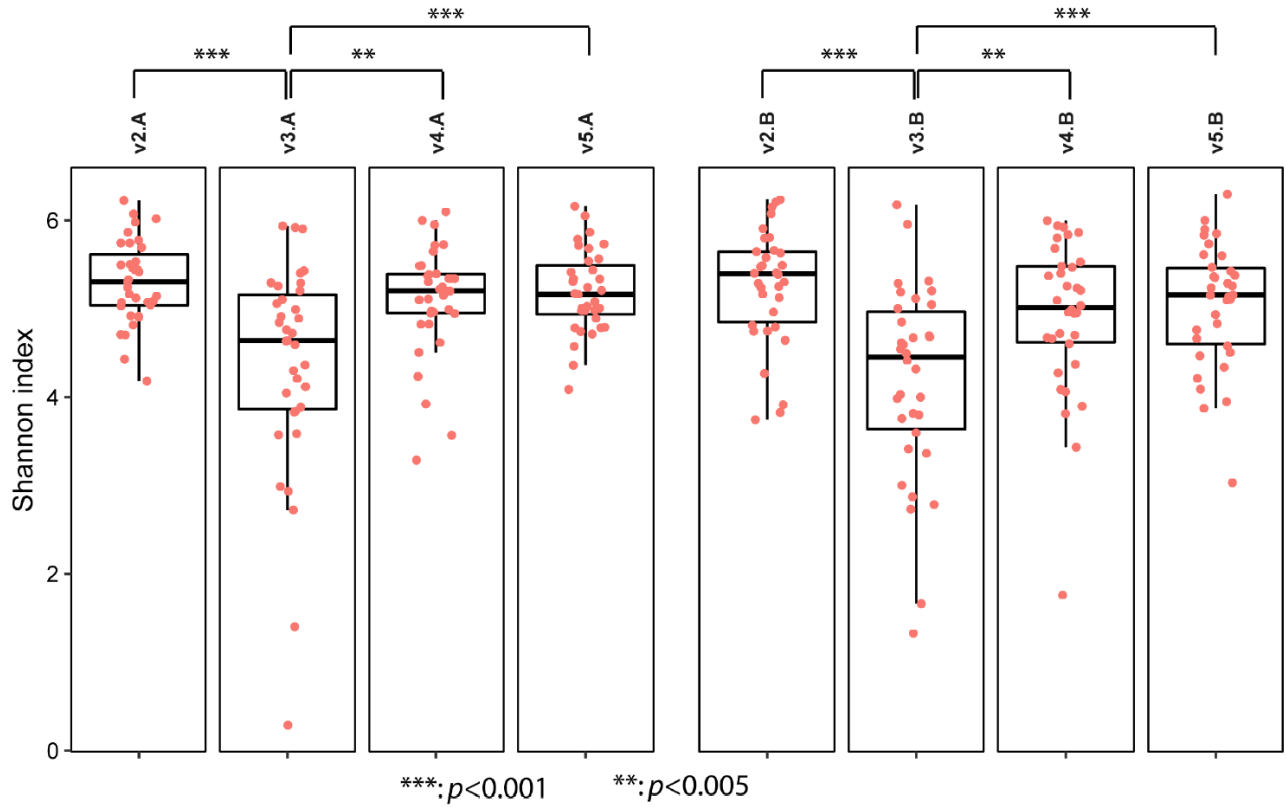

**Figure S1.** Alpha diversity metrics (Shannon index) boxplots computed from all OTUs for each experimental condition. Statistical significance was assessed with a t-test: For each group, comparisons between V3 and V2, V4 and V5 were significant (\*\*\*:  $p$ -value  $< 0.0001$  or \*\*:  $p$ -value  $< 0.005$ ). Group A - Placebo Supplement; Group B - Probiotic Supplement

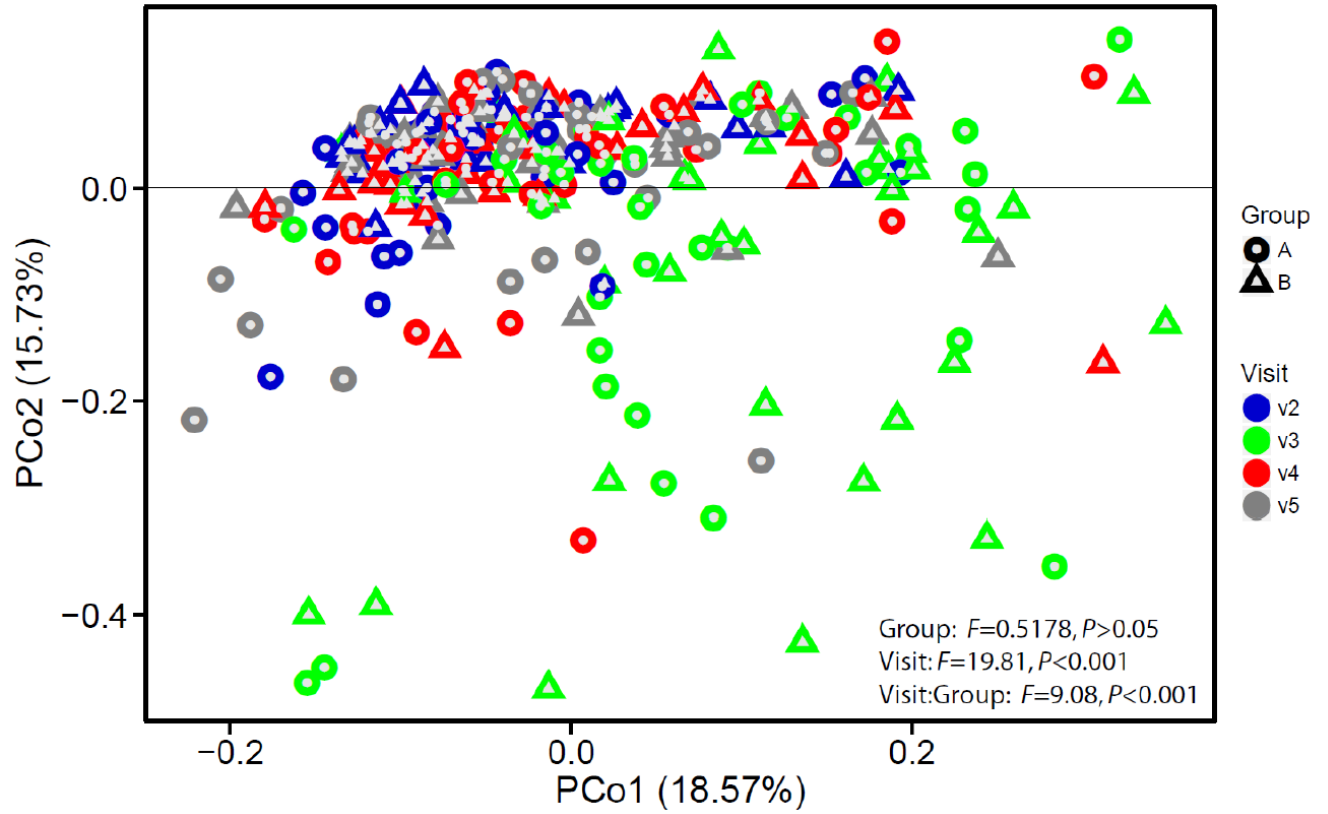

**Figure S2.** Beta diversity (Weighted UniFrac) metrics computed from all OTUs. Each point represents a sample. Permanova was performed using the “adonis” function of the vegan library. Group A - Placebo Supplement; Group B - Probiotic Supplement

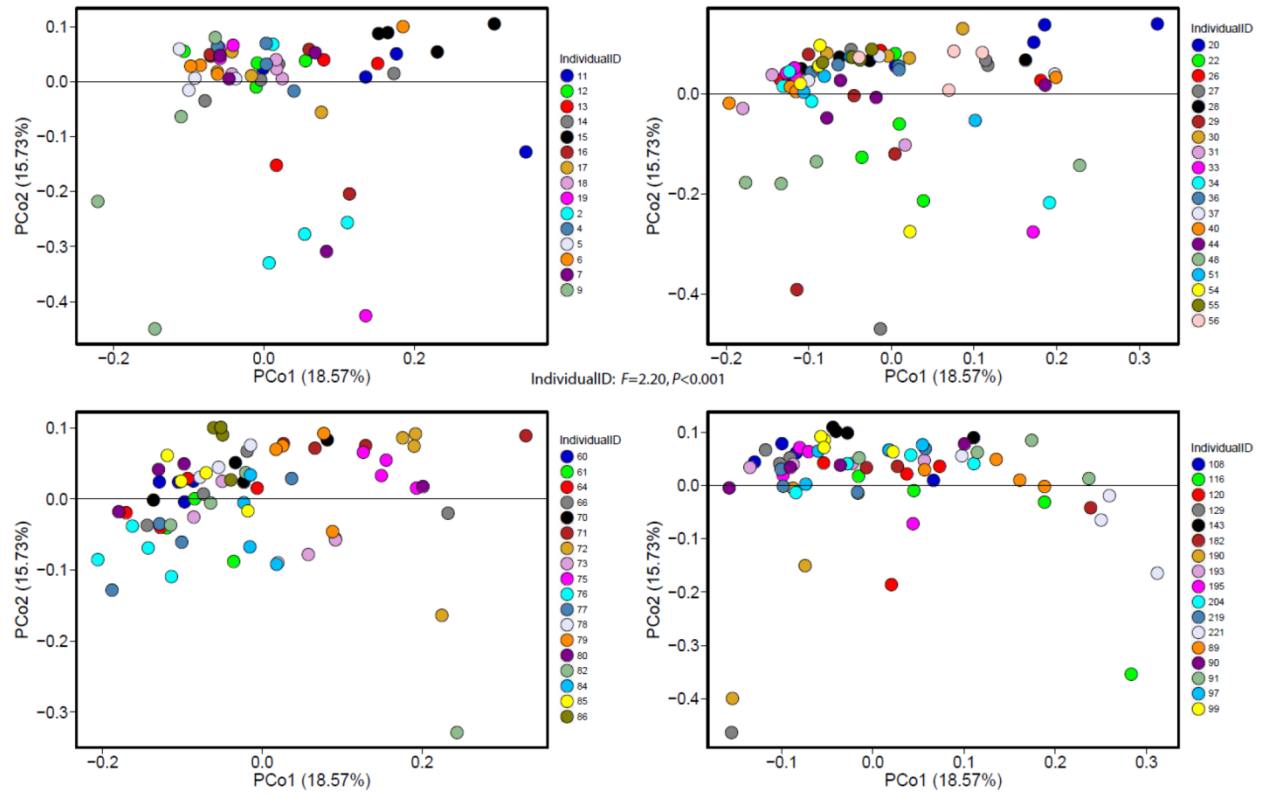

**Figure S3.** Beta diversity (Weighted UniFrac) metrics computed from all OTUs. Each point represents a sample. Permanova was performed using the “adonis” function of the vegan library. In each plot, all points having the same color represent a sample from the same individual for all experimental conditions.

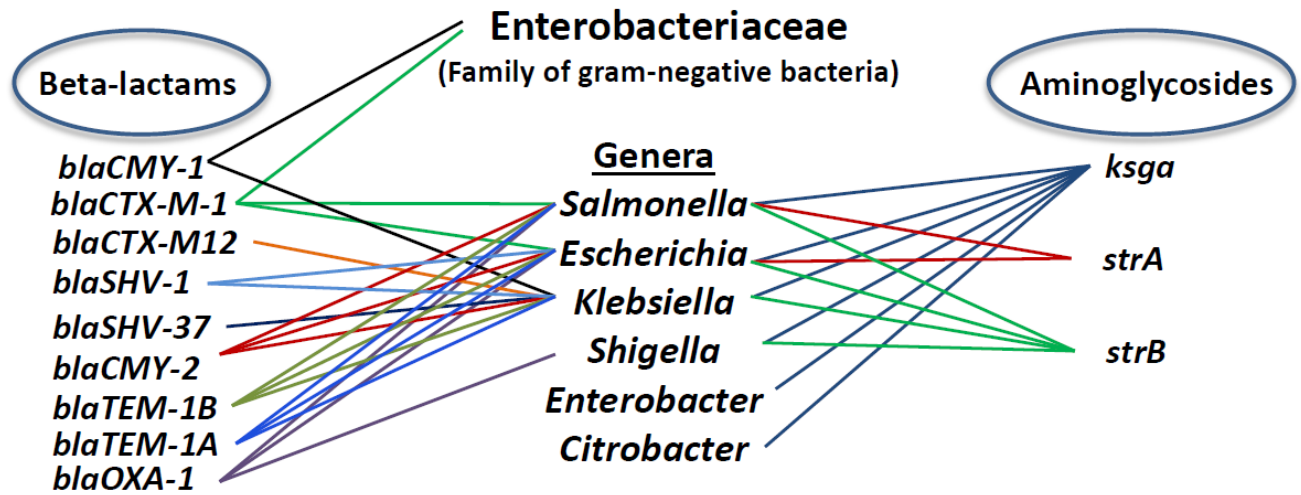

**Figure S4.** Summary *in silico* analysis of selected enriched ABR genes (Fig.8) for antimicrobial + supplement (visit 3) in both groups from the classes of aminoglycosides and beta-lactams that were linked to various opportunistic pathogens of the family of *Enterobacteriaceae* using the Comprehensive Antibiotic Resistance Database (CARD).
